# Supplementary material
Source: HighWire-hosted journal article supplement (https://www.ajevonline.org/highwire/filestream/1922/field_highwire_adjunct_files/0/ajev.2014.13133_SupplementalData.pdf)
Supplement: ajev.2014.13133_SupplementalData.pdf [file ajev.2014.13133_SupplementalData.pdf]

## Supplemental Data for:

Antalick, G., M.C. Perello, and G. de Revel. 2014.

Esters in wines: New insight through the establishment of a database of French wines.

Am. J. Enol. Vitic. 65:293-304. doi: 10.5344/ajev.2014.13133.

**Supplemental Table 1** Retention indexes (RI) (on BP21 column), odors, and olfactory perception thresholds, boiling point (BP), partitioning coefficients, and ions monitored in SIM detection for each compound (adapted from Antalick et al. 2010).

| Compound                        | RI   | Odors                              | Perception threshold ( $\mu\text{g/L}$ ) <sup>a</sup> | BP    | Log p | Selected ions <sup>b</sup> |
|---------------------------------|------|------------------------------------|-------------------------------------------------------|-------|-------|----------------------------|
| Ethyl propionate                | 987  | solvent, ripe strawberry           | 2100 (1)                                              | 99°C  | 1.21  | <b>102/57/75</b>           |
| Ethyl isobutyrate               | 992  | strawberry, kiwi, fruity, solvent  | 0.1 (2)                                               | 112°C | 1.77  | <b>116/88/71</b>           |
| Propyl acetate                  | 995  | solvent, fruity                    |                                                       | 102°C | 1.24  | <b>61/43</b>               |
| Methyl butyrate                 | 1022 | ripe kiwi, ripe strawberry, cheese |                                                       | 102°C | 1.29  | <b>74/87/71</b>            |
| Isobutyl acetate                | 1017 | solvent, fruity                    | 1600 (4)                                              | 116°C | 1.78  | <b>56/43</b>               |
| Ethyl butyrate                  | 1034 | ripe kiwi, ripe strawberry, cheese | 1 (2)                                                 | 120°C | 1.85  | <b>88/71/60</b>            |
| Ethyl 2-methylbutyrate          | 1046 | fruity, kiwi                       | 0.3 (2)                                               | 133°C | 1.59  | <b>102/57/85</b>           |
| Ethyl isovalerate               | 1064 | cheese, fruity                     | 3 (3)                                                 | 132°C | 2.26  | <b>88/85/57</b>            |
| Butyl acetate                   | 1070 | solvent, fruity                    | 65 (2)                                                | 125°C | 1.78  | <b>56/43</b>               |
| Isoamyl acetate                 | 1114 | banana                             | 2 (2)                                                 | 142°C | 2.26  | <b>70/55/43</b>            |
| Methyl hexanoate                | 1175 | pineapple, fruity, apple           |                                                       | 151°C | 2.34  | <b>74/87/99</b>            |
| Ethyl hexanoate                 | 1226 | pineapple, fruity, apple           | 1 (2)                                                 | 167°C | 2.83  | <b>88/99/60</b>            |
| Isoamyl butyrate                | 1250 | banana, apple, pineapple, fruity   |                                                       | 179°C | 3.25  | <b>71/70/55</b>            |
| Hexyl acetate                   | 1258 | pear                               | 2 (2)                                                 | 171°C | 2.83  | <b>56/43</b>               |
| Ethyl heptanoate                | 1320 | pineapple, fruity                  | 220 (5)                                               | 189°C | 3.32  | <b>88/101</b>              |
| Ethyl <i>trans</i> -2-hexenoate | 1331 | pineapple, fruity                  |                                                       | 183°C | 2.91  | <b>99/97/55</b>            |
| Isobutyl hexanoate              | 1340 | fruity, waxy                       |                                                       | 177°C | 3.71  | <b>99/56/71</b>            |
| Methyl octanoate                | 1363 | waxy, apple skin, fruity           |                                                       | 195°C | 3.32  | <b>74/87/127</b>           |
| Ethyl octanoate                 | 1420 | waxy, apple skin, fruity           | 580 (5)                                               | 207°C | 3.81  | <b>88/101/127</b>          |
| Isoamyl hexanoate               | 1437 | banana, pineapple, fruity          |                                                       | 220°C | 4.23  | <b>99/70</b>               |
| Octyl acetate                   | 1450 | waxy, fruity                       | 800 (1)                                               | 210°C | 3.81  | <b>56/43</b>               |
| Ethyl nonanoate                 | 1508 | waxy, fruity                       |                                                       | 229°C | 4.43  | <b>88/101</b>              |
| Methyl decanoate                | 1542 | waxy, soap, fruity                 |                                                       | 224°C | 4.41  | <b>74/87/</b>              |
| Ethyl decanoate                 | 1591 | waxy, soap, fruity                 | 200 (2)                                               | 243°C | 4.96  | <b>88/101</b>              |
| Isoamyl octanoate               | 1607 | wax, soap, pear                    |                                                       | 268°C | 5.31  | <b>127/70</b>              |
| Ethyl phenylacetate             | 1753 | flowery, rose, winy                | 73 (6)                                                | 229°C | 2.50  | <b>91/105</b>              |
| Phenylethyl acetate             | 1789 | flowery, mimosa, fruity, olive     | 250 (7)                                               | 239°C | 2.27  | <b>104/91/43</b>           |
| Ethyl dodecanoate               | 1832 | wax, soap                          |                                                       | 271°C | 5.71  | <b>88/101</b>              |
| Ethyl dihydrocinnamate          | 1871 | fruity, pineapple, almond          | 1.6 (3)                                               | 248°C | 2.73  | <b>104/91/178</b>          |
| Ethyl cinnamate                 | 2122 | cherry, fig, fruity, flowery       | 1.1 (3)                                               | 272°C | 2.99  | <b>176/131</b>             |

<sup>a</sup>Reference from which the value has been taken is given in parentheses:

(1) Dearomatized red wine: Pineau, B., J.C. Barbe, C. Van Leeuwen, and D. Dubourdieu. 2009. Examples of perceptive interactions involved in specific red-and-black-berry aromas in red wines. *J. Agric. Food Chem.* 57:3702-3708.

(2) Water: Buttery, R.G., R.M. Seifert, L.C. Ling, E.L. Soderstrom, J.M. Ogawa, and J.G. Turnbaugh. 1982. Additional aroma components of honeydew melon. *J. Agric. Food Chem.* 30:1208-1211.

(3) 11% water/ethanol solution containing 7 g/L glycerol and 5 g/L tartaric acid, pH adjusted to 3.4 with 1 M NaOH: Ferreira, V., R. Lopez, and J.F. Cacho. 2000. Quantitative determination of the odorants of young red wines from different grape varieties. *J. Sci. Food Agric.* 80:1659-1607.

(4) 10% water/ethanol mixture containing 5 g/L tartaric acid at pH 3.2: Aznar, M., R. Lopez, J.F. Cacho, and V. Ferreira. 2001. Identification and quantification of impact odorants of aged red wines from Rioja. GC-olfactometry, quantitative GC-MS, and odor evaluation of HPLC fractions. *J. Agric. Food Chem.* 49:2924-2929.

(5) Wine: Etievant, P.X. 1991. Wine. *In Volatile Compounds in Foods and Beverage*. H. Maarse (ed.), pp. 483-586. Dekker, New York.

(6) Red wine: Tat, L., P. Comuzzo, F. Battistutta, and R. Zironi 2007. Sweet-like off-flavor in Aglianico del Vulture wine: Ethyl phenylacetate as the mainly involved compound. *J. Agric. Food Chem.* 55:5205-5212.

(7) 10% water/ethanol solution: Guth, H. 1997. Quantitation and sensory studies of character impact odorants of different white wine varieties. *J. Agric. Food Chem.* 45:3027-3032.

<sup>b</sup>Quantitative ions are marked in bold font and qualitative ions are marked in regular font.

## Supplemental Data for:

Antalick, G., M.C. Perello, and G. de Revel. 2014.

Esters in wines: New insight through the establishment of a database of French wines.

Am. J. Enol. Vitic. 65:293-304. doi: 10.5344/ajev.2014.13133.

**Supplemental Table 2** Linearity, limits of detection (LOD) and quantification (LOQ), repeatability, reproducibility, and accuracy of the method.

|                                 | Internal standard              | Concn range               | Mean $r^2$ | Slope reproducibility (RSD %) (n = 3) | LOD ( $\mu\text{g/L}$ ) | LOQ ( $\mu\text{g/L}$ ) | Repeat-ability (RSD %) (n = 10) | Reproduc-ibility (RSD %) (n = 5) | Recovery <sup>a</sup> |               |                 |                                 |
|---------------------------------|--------------------------------|---------------------------|------------|---------------------------------------|-------------------------|-------------------------|---------------------------------|----------------------------------|-----------------------|---------------|-----------------|---------------------------------|
|                                 |                                |                           |            |                                       |                         |                         |                                 |                                  | Red (%)               | Dry white (%) | Sweet white (%) | Model solution <sup>b</sup> (%) |
| Ethyl propanoate                | ethyl-d <sub>5</sub> butyrate  | 1.22-609 $\mu\text{g/L}$  | 0.9949     | 2.7                                   | 1.22                    | 4.05                    | 3.9                             | 3.3                              | 105                   | 110           | 93              | 96                              |
| Ethyl isobutyrate               | ethyl-d <sub>5</sub> butyrate  | 1.11-554 $\mu\text{g/L}$  | 0.9966     | 5.6                                   | 0.2471                  | 0.8235                  | 3                               | 1.5                              | 106                   | 109           | 101             | 95                              |
| Propyl acetate                  | ethyl-d <sub>5</sub> butyrate  | 1.08-541 $\mu\text{g/L}$  | 0.9987     | 3.6                                   | 0.4518                  | 1.5060                  | 4.3                             | 4.8                              | 92                    | 107           | 120             | 85                              |
| Isobutyl acetate                | ethyl-d <sub>5</sub> butyrate  | 1.01-505 $\mu\text{g/L}$  | 0.9988     | 4.9                                   | 0.1618                  | 0.5392                  | 5.8                             | 6.1                              | 99                    | 103           | 92              | 97                              |
| Methyl butyrate                 | ethyl-d <sub>5</sub> butyrate  | 1.08-541 $\mu\text{g/L}$  | 0.9979     | 3.1                                   | 0.3254                  | 1.0846                  | 2.5                             | 4.2                              | 98                    | 96            | 100             | 85                              |
| Ethyl butyrate                  | ethyl-d <sub>5</sub> butyrate  | 8.14-4070 $\mu\text{g/L}$ | 0.9985     | 9.1                                   | 0.0346                  | 0.1154                  | 3                               | 3.6                              | 100                   | 106           | 107             | 94                              |
| Ethyl 2-methylbutyrate          | ethyl-d <sub>5</sub> butyrate  | 0.61-307 $\mu\text{g/L}$  | 0.9978     | 5.1                                   | 0.0172                  | 0.0575                  | 6.3                             | 7.3                              | 95                    | 109           | 103             | 100                             |
| Ethyl isovalerate               | ethyl-d <sub>5</sub> butyrate  | 0.58-291 $\mu\text{g/L}$  | 0.9966     | 7.9                                   | 0.0146                  | 0.0485                  | 4.9                             | 2.1                              | 103                   | 94            | 106             | 93                              |
| Butyl acetate                   | ethyl-d <sub>5</sub> butyrate  | 1.01-503 $\mu\text{g/L}$  | 0.9959     | 6.7                                   | 0.3051                  | 1.0169                  | 5.8                             | 15.0                             | 106                   | 95            | 98              | 95                              |
| Isoamyl acetate                 | ethyl-d <sub>5</sub> butyrate  | 5.37-2685 $\mu\text{g/L}$ | 0.9984     | 4.5                                   | 0.1097                  | 0.3658                  | 3.6                             | 3.4                              | 104                   | 97            | 120             | 89                              |
| Methyl hexanoate                | ethyl-d <sub>5</sub> hexanoate | 0.11-55 $\mu\text{g/L}$   | 0.9984     | 2.2                                   | 0.0064                  | 0.0213                  | 3.4                             | 3.9                              | 91                    | 105           | 94              | 85                              |
| Ethyl hexanoate                 | ethyl-d <sub>5</sub> hexanoate | 5.58-2790 $\mu\text{g/L}$ | 0.9970     | 6.8                                   | 0.0025                  | 0.0083                  | 4.7                             | 6.1                              | 94                    | 114           | 85              | 102                             |
| Isoamyl butyrate                | ethyl-d <sub>5</sub> hexanoate | 0.10-51.2 $\mu\text{g/L}$ | 0.9988     | 2.8                                   | 0.0056                  | 0.0188                  | 2.5                             | 3.3                              | 104                   | 95            | 95              | 95                              |
| Hexyl acetate                   | ethyl-d <sub>5</sub> hexanoate | 0.55-276 $\mu\text{g/L}$  | 0.9989     | 1.4                                   | 0.0115                  | 0.0384                  | 3.2                             | 5.2                              | 105                   | 91            | 97              | 95                              |
| Ethyl heptanoate                | ethyl-d <sub>5</sub> hexanoate | 0.12-58.3 $\mu\text{g/L}$ | 0.9977     | 6.3                                   | 0.0009                  | 0.0030                  | 2.4                             | 6.2                              | 95                    | 106           | 98              | 101                             |
| Ethyl <i>trans</i> -2-hexenoate | ethyl-d <sub>5</sub> hexanoate | 0.10-52.1 $\mu\text{g/L}$ | 0.9975     | 4.2                                   | 0.0138                  | 0.0461                  | 4.1                             | 3.3                              | 95                    | 93            | 78              | 92                              |
| Isobutyl hexanoate              | ethyl-d <sub>5</sub> hexanoate | 0.10-49.4 $\mu\text{g/L}$ | 0.9980     | 5.7                                   | 0.0014                  | 0.0048                  | 7.8                             | 8.0                              | 97                    | 115           | 83              | 106                             |
| Methyl octanoate                | ethyl-d <sub>5</sub> hexanoate | 0.11-55.8 $\mu\text{g/L}$ | 0.9986     | 2.5                                   | 0.0005                  | 0.0016                  | 6.6                             | 6.8                              | 95                    | 110           | 94              | 103                             |
| Ethyl octanoate                 | ethyl-d <sub>5</sub> octanoate | 5.6-2800 $\mu\text{g/L}$  | 0.9990     | 7.0                                   | 0.0009                  | 0.0031                  | 5                               | 9.0                              | 95                    | 83            | 97              | 99                              |
| Isoamyl hexanoate               | ethyl-d <sub>5</sub> octanoate | 0.11-54.4 $\mu\text{g/L}$ | 0.9973     | 4.4                                   | 0.0011                  | 0.0038                  | 3.2                             | 4.2                              | 102                   | 112           | 95              | 93                              |
| Octyl acetate                   | ethyl-d <sub>5</sub> octanoate | 0.12-58.7 $\mu\text{g/L}$ | 0.9953     | 8.7                                   | 0.0044                  | 0.0148                  | 11.2                            | 11.8                             | 103                   | 112           | 111             | 87                              |
| Ethyl nonanoate                 | ethyl-d <sub>5</sub> octanoate | 0.12-59.8 $\mu\text{g/L}$ | 0.9963     | 4.0                                   | 0.0004                  | 0.0013                  | 3                               | 6.2                              | 99                    | 102           | 111             | 107                             |
| Methyl decanoate                | ethyl-d <sub>5</sub> octanoate | 0.12-60.4 $\mu\text{g/L}$ | 0.9982     | 4.5                                   | 0.0001                  | 0.0004                  | 4.6                             | 11.4                             | 94                    | 124           | 101             | 106                             |
| Ethyl decanoate                 | ethyl-d <sub>5</sub> octanoate | 5.32-2660 $\mu\text{g/L}$ | 0.9976     | 3.7                                   | 0.0002                  | 0.0006                  | 6.4                             | 8.8                              | 94                    | 120           | 130             | 107                             |
| Isoamyl octanoate               | ethyl-d <sub>5</sub> octanoate | 0.56-278 $\mu\text{g/L}$  | 0.9966     | 13.9                                  | 0.0021                  | 0.0070                  | 5.4                             | 12.7                             | 92                    | 117           | 90              | 97                              |
| Ethyl dodecanoate               | ethyl-d <sub>5</sub> octanoate | 5.27-527 $\mu\text{g/L}$  | 0.9924     | 9.1                                   | 0.0001                  | 0.0004                  | 8.6                             | 12.9                             | 109                   | 116           | 106             | 114                             |
| Ethyl phenylacetate             | ethyl-d <sub>5</sub> cinnamate | 0.64-322 $\mu\text{g/L}$  | 0.9951     | 1.6                                   | 0.0071                  | 0.0238                  | 3.7                             | 4.0                              | 105                   | 92            | 101             | 91                              |
| Phenylethyl acetate             | ethyl-d <sub>5</sub> cinnamate | 0.59-295 $\mu\text{g/L}$  | 0.9985     | 4.4                                   | 0.0050                  | 0.0166                  | 4.1                             | 4.8                              | 100                   | 96            | 107             | 89                              |
| Ethyl dihydrocinnamate          | ethyl-d <sub>5</sub> cinnamate | 0.59-297 $\mu\text{g/L}$  | 0.9987     | 6.6                                   | 0.0030                  | 0.0100                  | 7.4                             | 2.6                              | 102                   | 102           | 113             | 97                              |
| Ethyl cinnamate                 | ethyl-d <sub>5</sub> cinnamate | 0.64-319 $\mu\text{g/L}$  | 0.9990     | 1.5                                   | 0.0136                  | 0.0453                  | 2.1                             | 4.0                              | 96                    | 102           | 108             | 100                             |

<sup>a</sup>For recovery calculations, wine samples were spiked at 50  $\mu\text{g/L}$  for ethyl esters of fatty acids, higher alcohol acetates, ethyl esters of branched acids, and ethyl propionate. Cinnamates, methyl esters, isoamyl esters, ethyl esters of odd carbon number fatty acids, ethyl *trans*-2-hexenoate, and isobutyl hexanoate were spiked at 5  $\mu\text{g/L}$ .

<sup>b</sup>Model solution (ethanol in water, 12% vol).

**Supplemental Data for:**

Antalick, G., M.C. Perello, and G. de Revel. 2014.

Esters in wines: New insight through the establishment of a database of French wines.

Am. J. Enol. Vitic. 65:293-304. doi: 10.5344/ajev.2014.13133.

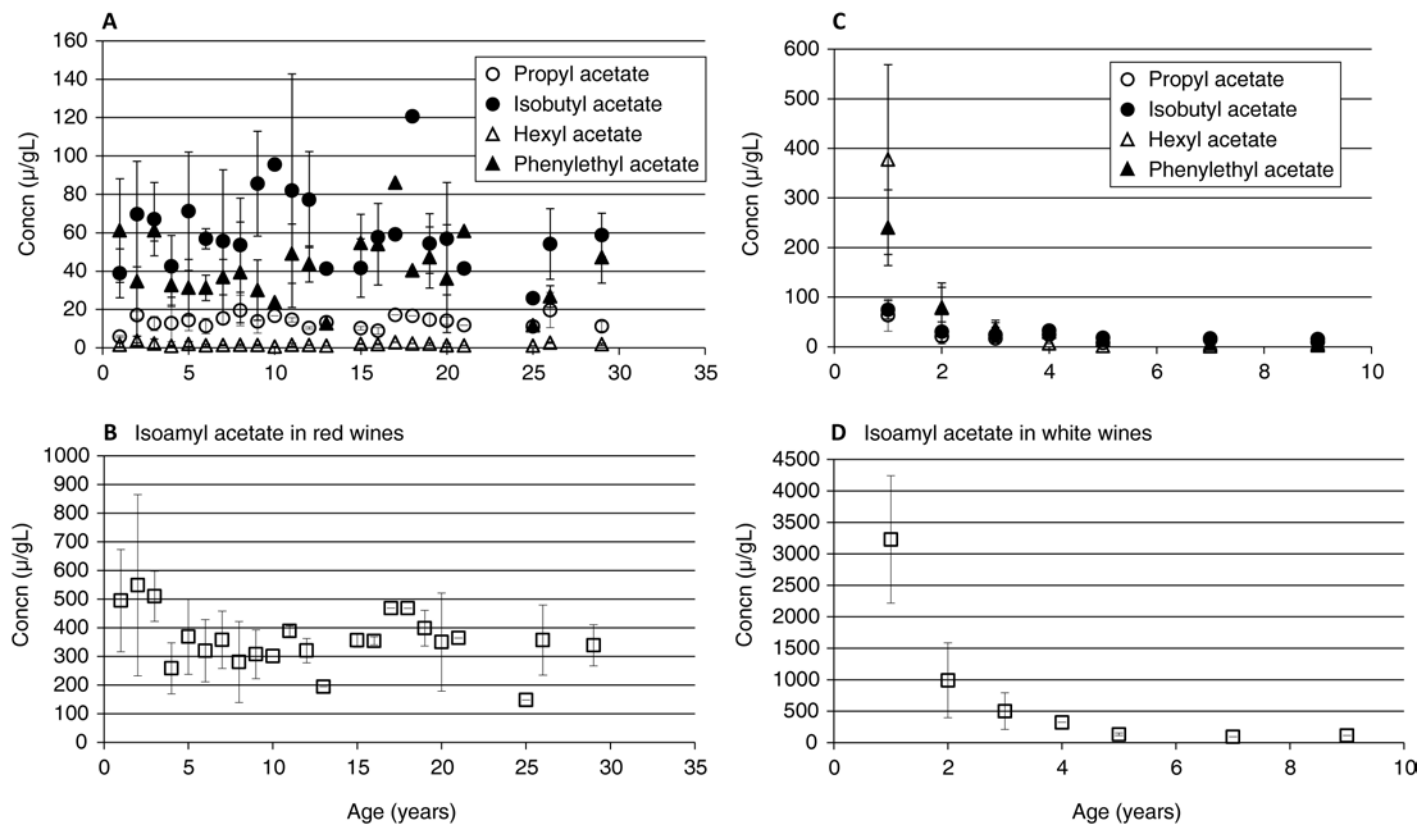

**Supplemental Figure 1** Evolution of mean concentrations of higher alcohol acetates with standard deviations according to wine age. Propyl, isobutyl, hexyl, and phenylethyl acetates in red wines (**A**) and white wines (**C**); isoamyl acetate in red wines (**B**) and white wines (**D**).

**Supplemental Data for:**

Antalick, G., M.C. Perello, and G. de Revel. 2014.

Esters in wines: New insight through the establishment of a database of French wines.

Am. J. Enol. Vitic. 65:293-304. doi: 10.5344/ajev.2014.13133.

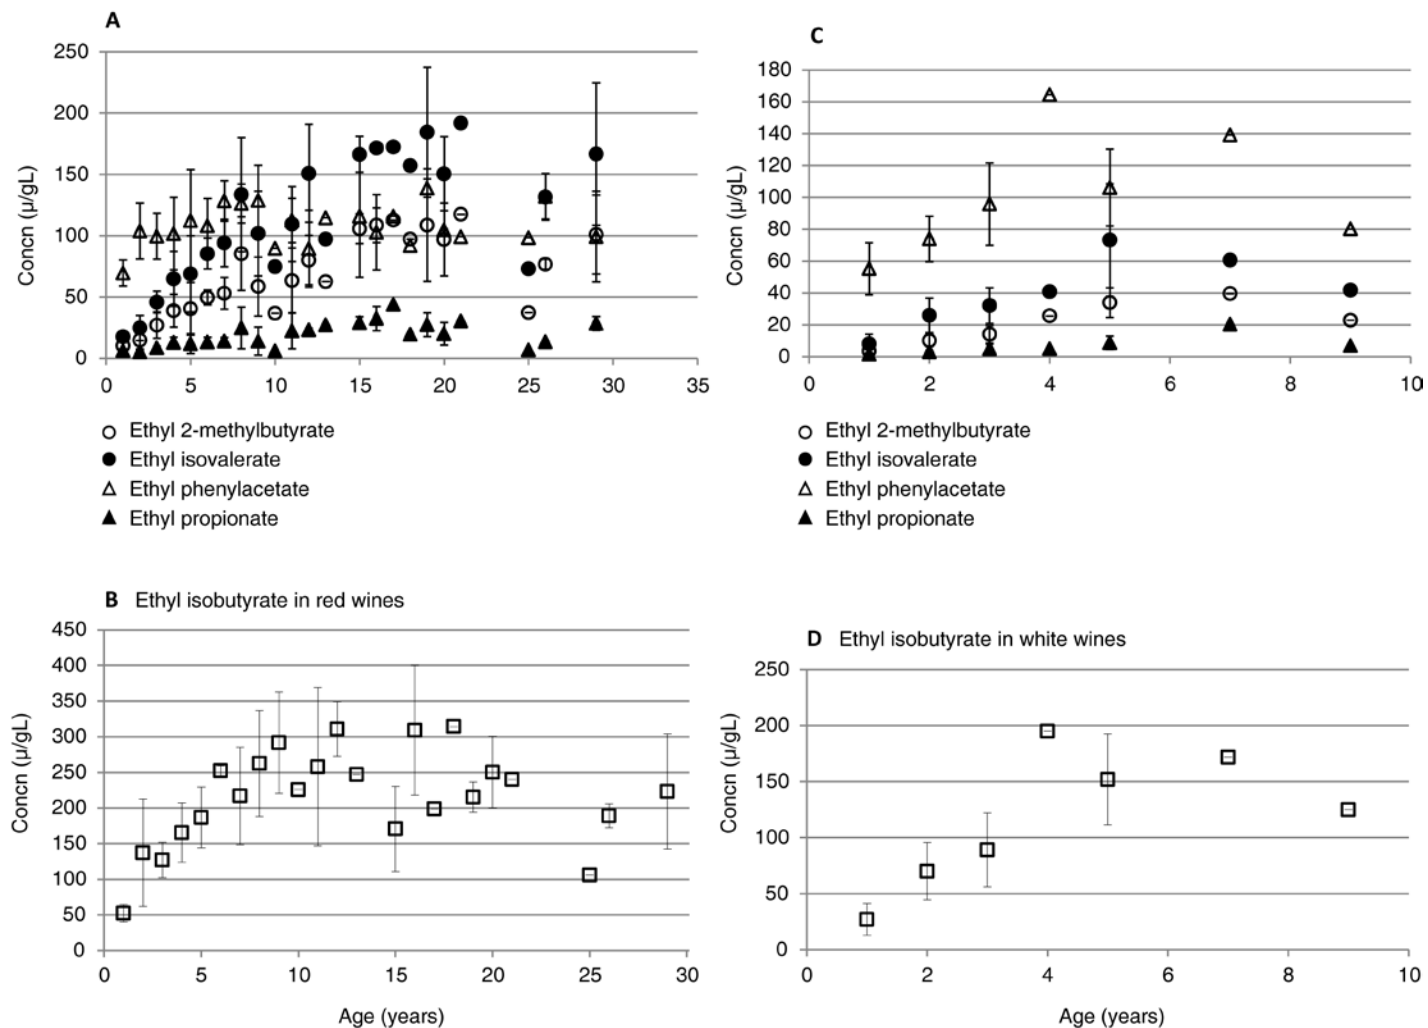

**Supplemental Figure 2** Evolution of mean concentrations of ethyl esters of branched acids with standard deviations according to wine age. Ethyl 2-methylbutyrate, isovalerate, phenylacetate, and propionate in red wines (**A**) and white wines (**C**); ethyl isobutyrate in red wines (**B**) and white wines (**D**).
